# Supplementary material
Source: Frontiers journal article supplement (https://www.frontiersin.org/articles/98020)
Supplement: Presentation_1.PDF [file Presentation_1.PDF]

**Table S1.** Antibodies and the respective rexed laminae analyzed.

| Antibody      | Analyzed laminae                                |
|---------------|-------------------------------------------------|
| Synaptophysin | I and II, V and VI, IX                          |
| VGLUT1        | III, V and VI, IX                               |
| GAD65         | III                                             |
| GFAP          | I and II, IX                                    |
| GAP-43        | Dorsal roots, laminae<br>I and II, V and VI, IX |

**Table S2.** GFAP immunolabeling quantification at laminae I and II (integrated density of pixels). The values are presented as mean  $\pm$  standard error.

| Survival time\Group | RZ/n              | RZ+FS/n           | RZ+FS+MC/n        |
|---------------------|-------------------|-------------------|-------------------|
| <b>1 week</b>       | 2.19 $\pm$ 1.19/5 | 2.15 $\pm$ 0.57/5 | 2.45 $\pm$ 0.33/6 |
| <b>4 weeks</b>      | 4.66 $\pm$ 1.22/5 | 2.63 $\pm$ 0.32/5 | 1.83 $\pm$ 0.19/5 |
| <b>8 weeks</b>      | 5.81 $\pm$ 1.38/5 | 3.38 $\pm$ 0.65/6 | 2.43 $\pm$ 0.25/5 |

FS, fibrin sealant; MC, mononuclear cells; RZ, rhizotomy.

**Table S3.** GFAP immunolabeling quantification at lamina IX (integrated density of pixels). The values are presented as mean  $\pm$  standard error.

| Survival time\Group | RZ/n              | RZ+FS/n           | RZ+FS+MC/n        |
|---------------------|-------------------|-------------------|-------------------|
| <b>1 week</b>       | 1.84 $\pm$ 0.25/5 | 1.62 $\pm$ 0.31/5 | 1.73 $\pm$ 0.26/5 |
| <b>4 weeks</b>      | 1.66 $\pm$ 0.11/5 | 2.27 $\pm$ 0.61/5 | 1.49 $\pm$ 0.08/5 |
| <b>8 weeks</b>      | 3.36 $\pm$ 0.55/5 | 1.80 $\pm$ 0.25/6 | 1.40 $\pm$ 0.15/5 |

FS, fibrin sealant; MC, mononuclear cells; RZ, rhizotomy.

**Table S4.** Iba1 immunolabeling quantification at laminae I and II (integrated density of pixels). The values are presented as mean  $\pm$  standard error.

| Survival time\Group | RZ/n              | RZ+FS/n           | RZ+FS+MC/n        |
|---------------------|-------------------|-------------------|-------------------|
| <b>1 week</b>       | 4.34 $\pm$ 0.55/5 | 2.94 $\pm$ 0.33/5 | 4.04 $\pm$ 0.31/5 |
| <b>4 weeks</b>      | 2.57 $\pm$ 0.15/6 | 1.79 $\pm$ 0.17/5 | 1.75 $\pm$ 0.18/5 |
| <b>8 weeks</b>      | 3.24 $\pm$ 0.50/6 | 2.30 $\pm$ 0.26/6 | 1.56 $\pm$ 0.15/5 |

FS, fibrin sealant; MC, mononuclear cells; RZ, rhizotomy.

**Table S5.** Iba1 immunolabeling quantification at lamina IX (integrated density of pixels). The values are presented as mean  $\pm$  standard error.

| Survival time\Group | RZ/n              | RZ+FS/n           | RZ+FS+MC/n        |
|---------------------|-------------------|-------------------|-------------------|
| <b>1 week</b>       | 1.84 $\pm$ 0.13/5 | 1.43 $\pm$ 0.11/5 | 1.46 $\pm$ 0.06/5 |
| <b>4 weeks</b>      | 1.48 $\pm$ 0.07/5 | 1.63 $\pm$ 0.22/5 | 1.31 $\pm$ 0.05/5 |
| <b>8 weeks</b>      | 1.71 $\pm$ 0.23/6 | 1.42 $\pm$ 0.10/6 | 1.25 $\pm$ 0.16/5 |

FS, fibrin sealant; MC, mononuclear cells; RZ, rhizotomy.

**Table S6.** VGLUT1 immunolabeling quantification at lamina III (integrated density of pixels). The values are presented as mean  $\pm$  standard error.

| Survival time\Group | RZ/n              | RZ+FS/n           | RZ+FS+MC/n        |
|---------------------|-------------------|-------------------|-------------------|
| <b>1 week</b>       | 0.25 $\pm$ 0.06/5 | 0.59 $\pm$ 0.07/5 | 0.67 $\pm$ 0.11/6 |
| <b>4 weeks</b>      | 0.43 $\pm$ 0.06/5 | 0.75 $\pm$ 0.14/5 | 0.67 $\pm$ 0.11/5 |
| <b>8 weeks</b>      | 0.42 $\pm$ 0.05/5 | 0.79 $\pm$ 0.06/6 | 0.91 $\pm$ 0.07/5 |

FS, fibrin sealant; MC, mononuclear cells; RZ, rhizotomy.

**Table S7.** VGLUT1 immunolabeling quantification at lamina IX (integrated density of pixels). The values are presented as mean  $\pm$  standard error.

| Survival time\Group | RZ/n              | RZ+FS/n           | RZ+FS+MC/n        |
|---------------------|-------------------|-------------------|-------------------|
| <b>1 week</b>       | 0.09 $\pm$ 0.02/5 | 0.27 $\pm$ 0.12/5 | 0.50 $\pm$ 0.08/5 |
| <b>4 weeks</b>      | 0.09 $\pm$ 0.03/5 | 0.27 $\pm$ 0.06/5 | 0.28 $\pm$ 0.10/5 |
| <b>8 weeks</b>      | 0.05 $\pm$ 0.01/5 | 0.11 $\pm$ 0.03/6 | 0.46 $\pm$ 0.13/5 |

FS, fibrin sealant; MC, mononuclear cells; RZ, rhizotomy.

**Table S8.** GAD65 immunolabeling quantification at lamina III (integrated density of pixels). The values are presented as mean  $\pm$  standard error.

| Survival time\Group | RZ/n              | RZ+FS/n           | RZ+FS+MC/n        |
|---------------------|-------------------|-------------------|-------------------|
| <b>1 week</b>       | 1.09 $\pm$ 0.03/5 | 0.96 $\pm$ 0.04/5 | 0.95 $\pm$ 0.04/5 |
| <b>4 weeks</b>      | 1.17 $\pm$ 0.09/5 | 1.15 $\pm$ 0.09/5 | 1.10 $\pm$ 0.05/5 |
| <b>8 weeks</b>      | 1.24 $\pm$ 0.02/6 | 1.02 $\pm$ 0.05/5 | 0.96 $\pm$ 0.07/5 |

FS, fibrin sealant; MC, mononuclear cells; RZ, rhizotomy.

**Table S9.** Synaptophysin Immunolabeling Quantification At Laminae I and II (Integrated Density of Pixels). The Values Are Presented As Mean  $\pm$  Standard Error.

| Survival Time\Group | RZ/n              | RZ+FS/n           | RZ+FS+MC/n        |
|---------------------|-------------------|-------------------|-------------------|
| <b>1 week</b>       | 0.89 $\pm$ 0.08/5 | 1.06 $\pm$ 0.05/5 | 1.16 $\pm$ 0.05/6 |
| <b>4 weeks</b>      | 1.19 $\pm$ 0.13/6 | 1.16 $\pm$ 0.10/6 | 0.99 $\pm$ 0.04/5 |
| <b>8 weeks</b>      | 1.12 $\pm$ 0.10/5 | 1.15 $\pm$ 0.15/6 | 1.16 $\pm$ 0.04/5 |

FS, fibrin sealant; RZ, rhizotomy; MC, mononuclear cells.

**Table S10.** Synaptophysin Immunolabeling Quantification At Laminae V and VI (Integrated Density of Pixels). The Values Are Presented As Mean  $\pm$  Standard Error.

| Survival time\Group | RZ/n              | RZ+FS/n           | RZ+FS+MC/n        |
|---------------------|-------------------|-------------------|-------------------|
| <b>1 week</b>       | 1.11 $\pm$ 0.06/4 | 1.13 $\pm$ 0.12/5 | 0.97 $\pm$ 0.07/5 |
| <b>4 weeks</b>      | 0.95 $\pm$ 0.08/5 | 1.07 $\pm$ 0.05/6 | 1.00 $\pm$ 0.06/5 |
| <b>8 weeks</b>      | 0.88 $\pm$ 0.11/6 | 0.97 $\pm$ 0.10/6 | 0.93 $\pm$ 0.06/5 |

FS, fibrin sealant; RZ, rhizotomy; MC, mononuclear cells.

**Table S11.** Synaptophysin Quantification At Lamina IX (Integrated Density of Pixels). The Values Are Presented As Mean  $\pm$  Standard Error.

| Survival time\Group | RZ/n              | RZ+FS/n           | RZ+FS+MC/n        |
|---------------------|-------------------|-------------------|-------------------|
| <b>1 week</b>       | 0.85 $\pm$ 0.04/5 | 0.94 $\pm$ 0.08/5 | 0.92 $\pm$ 0.05/5 |
| <b>4 weeks</b>      | 0.84 $\pm$ 0.04/6 | 0.90 $\pm$ 0.08/6 | 0.86 $\pm$ 0.11/5 |
| <b>8 weeks</b>      | 0.75 $\pm$ 0.08/5 | 0.90 $\pm$ 0.08/5 | 0.83 $\pm$ 0.05/5 |

FS, fibrin sealant; RZ, rhizotomy; MC, mononuclear cells.
